# Supplementary material for: Probing metal-dependent G-quadruplexes using the intrinsic fluorescence of DNA
Source: Royal Society of Chemistry journal article supplement (doi:10.1039/d2cc03967b), 2022-01-01
Supplement: d2cc03967b1.pdf [file d2cc03967b1.pdf]

## **Electronic supplementary information**

### **Probing metal-dependent G-quadruplexes using the intrinsic fluorescence of DNA**

Anand Lopez and Juewen Liu\*

Department of Chemistry, Waterloo Institute for Nanotechnology, University of Waterloo,  
Waterloo, ON, N2L 3G1, Canada.

Email: [liujw@uwaterloo.ca](mailto:liujw@uwaterloo.ca)

## Materials and Methods

All DNA sequences were purchased from Integrated DNA Technologies (Coralville, Iowa), dissolved in Milli-Q water at a stock concentration of 100  $\mu\text{M}$ , and used without further purification. Potassium chloride (KCl), sodium chloride (NaCl) and calcium chloride ( $\text{CaCl}_2$ ) were purchased from VWR Canada. Lead ( $\text{Pb}^{2+}$ ) acetate, strontium chloride hexahydrate ( $\text{SrCl}_2 \cdot 6\text{H}_2\text{O}$ ), barium chloride dihydrate ( $\text{BaCl}_2 \cdot 2\text{H}_2\text{O}$ ), caesium chloride (CsCl), lithium chloride (LiCl) and thioflavin T (ThT) were purchased from Sigma-Aldrich. KCl was prepared to a stock concentration of 3M, while lead acetate was prepared to a stock concentration of 100  $\mu\text{M}$ . All other ions were prepared to a stock concentration of 100 mM. Prior to measurement, each DNA was diluted to a working concentration of 5  $\mu\text{M}$ .

### Measurement of Fluorescence Spectra.

In a typical experiment, 200  $\mu\text{L}$  of working DNA solution was placed in a 1 cm  $\times$  0.2 cm cuvette and the fluorescence was measured using a HORIBA Jobin-Yvon FluoroMax-3 spectrofluorimeter. Slit widths for both excitation and emission monochromators were set at 5 nm. Data integration was set at 0.2 s with a 1 nm data pitch for steady-state spectra. For kinetics experiments, fluorescence was measured every 30 seconds for 30 minutes, with excitation and emission set for the specific sequence. The fluorescence was measured for 5 min (to ensure stability) before the addition of  $\text{K}^+$ ,  $\text{Pb}^{2+}$ , or any other metal ions. The fluorescence was then followed for the remaining 25 min. Excitation wavelengths were DNA-dependent, with PS2.M, PW17 and T30695 being excited at 290 nm,  $\text{K}^+$  aptamer at 295 nm and  $\text{A}_{30}$  at 300 nm. ThT measurements were similar to above, except 5  $\mu\text{M}$  ThT was added prior to the measurement, and the excitation was set at 425 nm (detecting at 490 nm for kinetics experiments), with slit widths at 1 nm.

### $\text{A}_{30}$ Purification

A Sep Pak  $\text{C}_{18}$  column was hydrated using solvents of increasing polarity, followed by the addition of 200  $\mu\text{L}$  of a 20  $\mu\text{M}$   $\text{A}_{30}$  solution. The eluate was collected and re-added to the column 7 times, and the final eluate was discarded. Then, the column was rinsed with  $2 \times 10$  mL aliquots of Milli-Q water. Finally, the bound DNA was eluted using 1 mL of 1:1:1 acetonitrile:methanol: $\text{H}_2\text{O}$  solution and a 95% acetonitrile solution. The eluate was lyophilized under vacuum centrifugation and resuspended in Milli-Q water. The fluorescence before and after purification was measured by a Cary Eclipse (Varian) fluorimeter. The UV/Vis spectra was collected by an Agilent 8453A spectrophotometer.

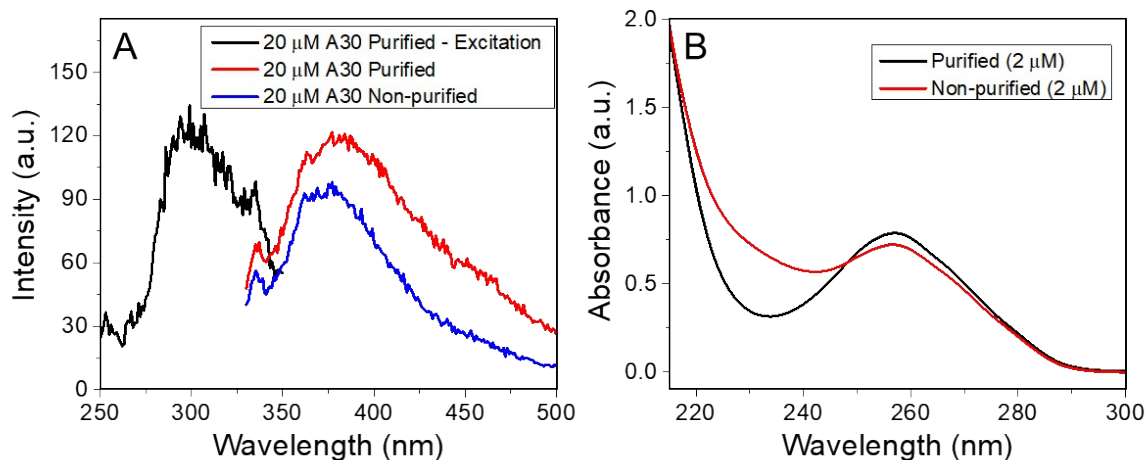

**Figure S1.** (A) Fluorescence and (B) UV/Vis spectra of A<sub>30</sub> DNA before and after purification with reverse-phase chromatography. Excitation at 300 nm was used for emission spectra.

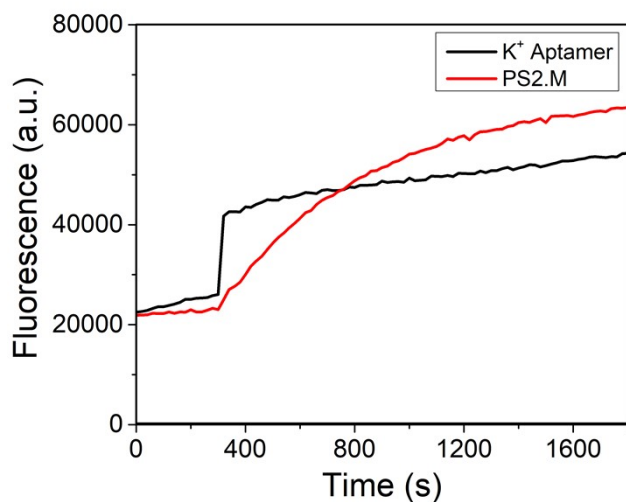

**Figure S2.** Response of the intrinsic fluorescence of 5 μM K<sup>+</sup> aptamer and PS2.M to 60 mM K<sup>+</sup>.

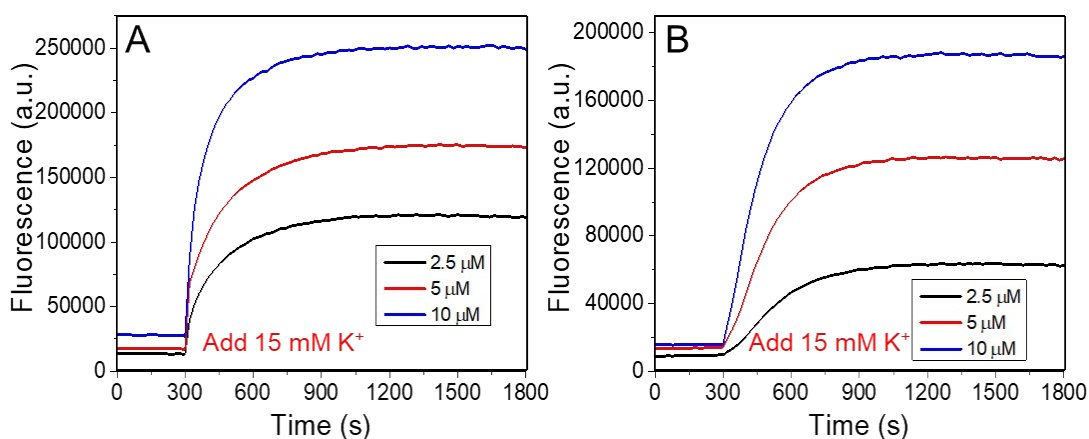

**Figure S3.** Kinetics of fluorescence change of (A) T30695 and (B) PW17 as a function of DNA concentration upon the addition of 15 mM  $K^+$  at 300 sec in Milli-Q water.

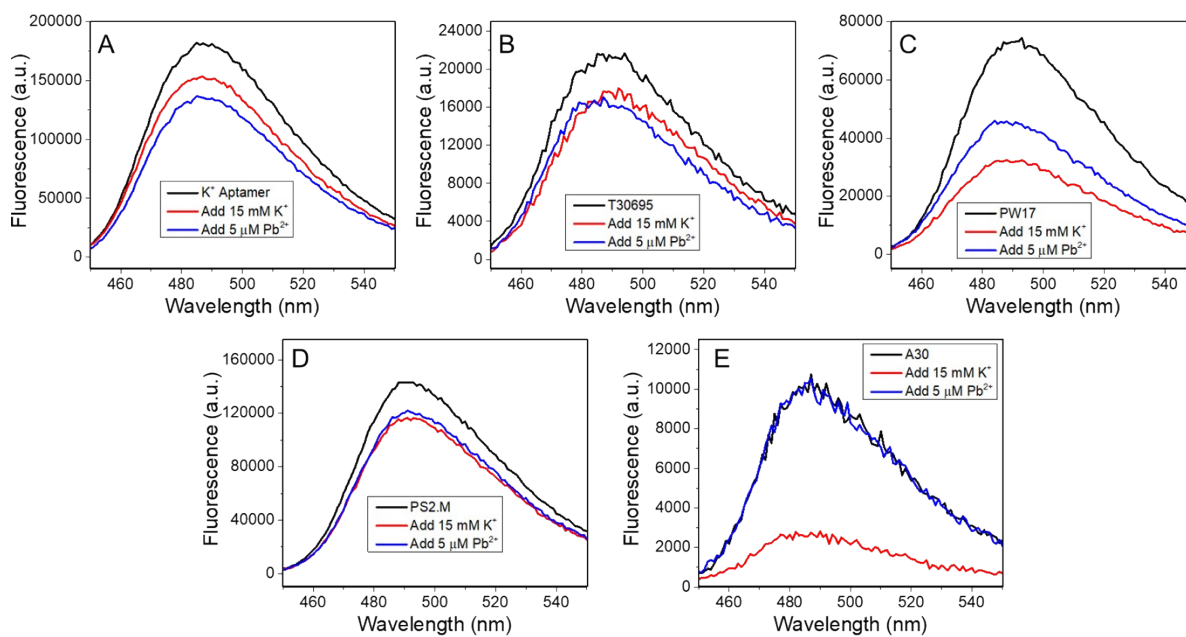

**Figure S4.** ThT fluorescence spectra with (A)  $K^+$  aptamer, (B) T30695, (C) PW17, (D) PS2.M, and (E) A<sub>30</sub> in Milli-Q water. Excitation was at 425 nm.

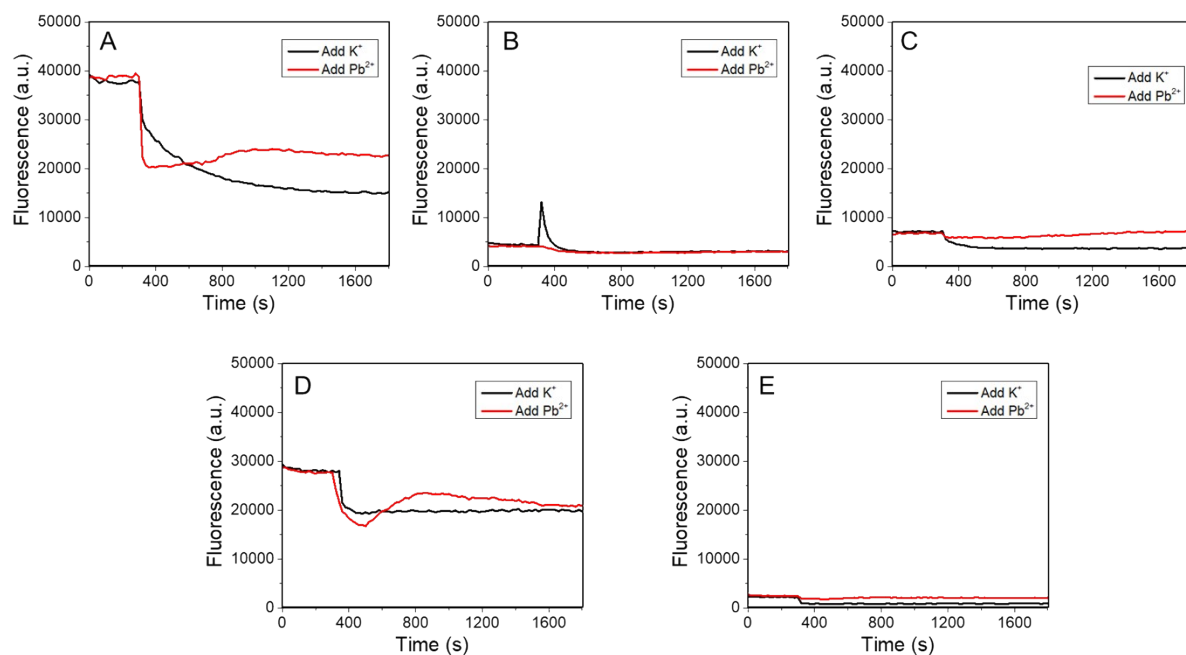

**Figure S5.** ThT fluorescence kinetics for (A) K<sup>+</sup> aptamer, (B) T30695, (C) PW17, (D) PS2.M, (E) A<sub>30</sub> in Milli-Q water. Excitation was at 425 nm and emission was set at 490 nm.

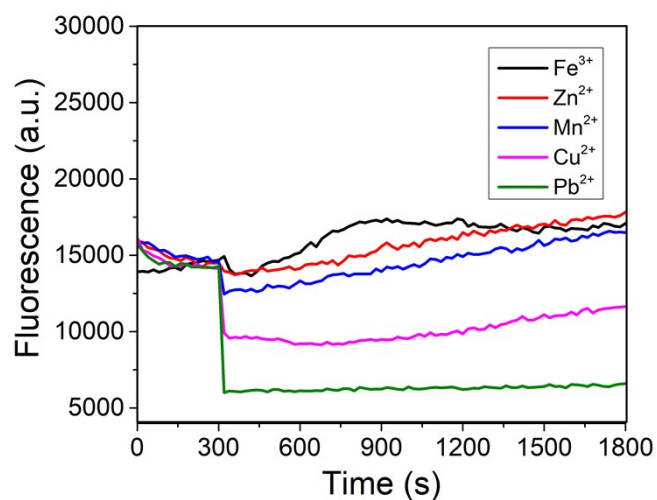

**Figure S6.** Response of 5 μM T30695 to 5 μM of different metal ions.
